# Supplementary material for: Suitability of sugar alcohols as antidiabetic supplements: A review
Source: PubMed Central journal article supplement — J Food Drug Anal. 2021 Mar 15;29(1):1–14. doi: 10.38212/2224-6614.3107 (PMC9261844; doi:10.38212/2224-6614.3107), 2021-03-15
Supplement: jfda-29-01-001-s001.pdf [file jfda-29-01-001-s001.pdf]

## **Research highlights**

- Most of the sugar alcohols have potential anti-diabetic potentials while their sweetening power is an added advantage.
- Mechanisms behind the anti-diabetic effects of various sugar are not fully explored so further studies are needed.
- There are limited studies on the possible toxicity and/or side effects associated with the usage of sugar alcohols.
